# Supplementary figures and images for: Cooperativity between sodium ions and water molecules facilitates lipid mobility in model cell membranes
Source: Royal Society of Chemistry journal article supplement (doi:10.1039/d2sc06836b), 2023-01-01

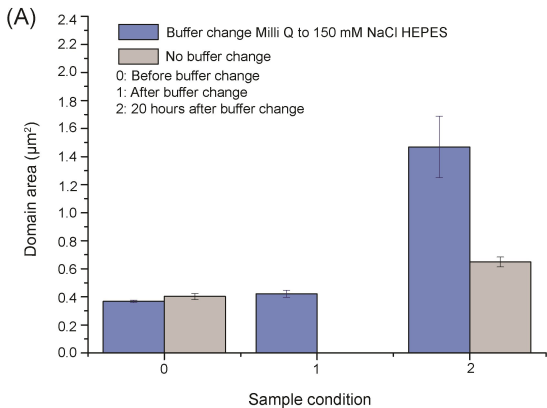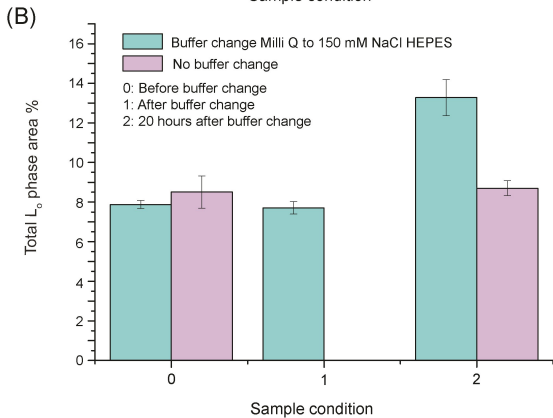

Supplement: d2sc06836b2.pdf [file d2sc06836b2.pdf]

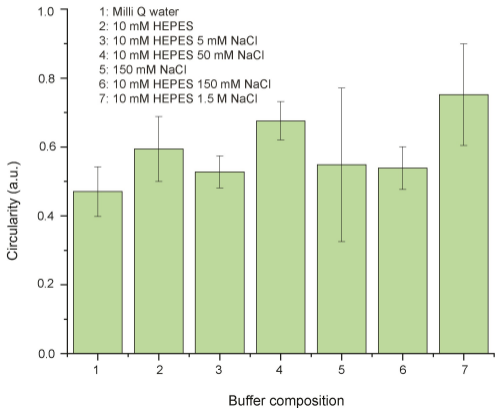

Supplement: d2sc06836b3.pdf [file d2sc06836b3.pdf]

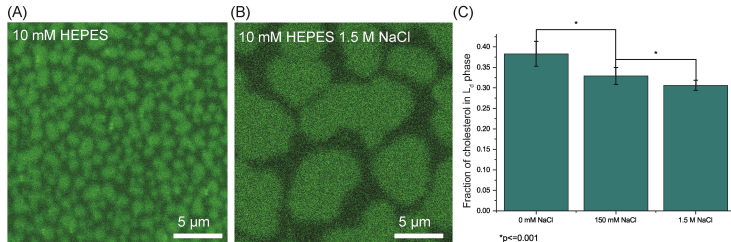

Supplement: d2sc06836b4.pdf [file d2sc06836b4.pdf]

10 mM HEPES 1.5 M NaCl

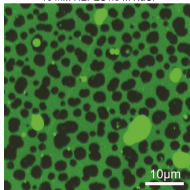

10 mM HEPES

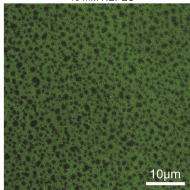

Supplement: d2sc06836b5.pdf [file d2sc06836b5.pdf]

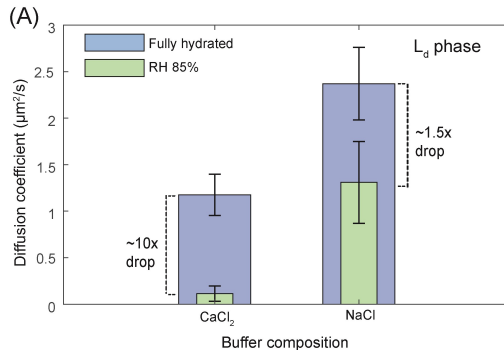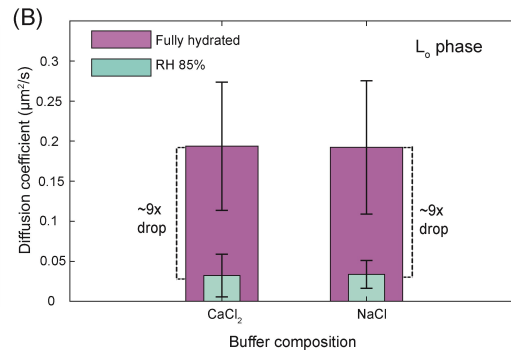

Supplement: d2sc06836b7.pdf [file d2sc06836b7.pdf]
